# Supplementary material for: Selective hydrogenation of the CC bond of α,β-unsaturated carbonyl compounds over PdNPs–SBA-15 in a water medium
Source: Royal Society of Chemistry journal article supplement (doi:10.1039/c3ra41966e), 2013-01-01
Supplement: c3ra41966e.pdf [file c3ra41966e.pdf]

## Selective hydrogenation of C = C bond of $\alpha$ , $\beta$ -unsaturated carbonyl compounds over PdNPs/SBA-15 on water medium

Saidulu Ganji, Suresh Mutyala, Chinna Krishna Prasad Neeli, Kamaraju Seetha Rama Rao and David Raju Burri \*

*Received (in XXX, XXX) Xth XXXXXXXXXX 20XX, Accepted Xth XXXXXXXXXX 20XX*

DOI: 10.1039/b000000x

TEM images:

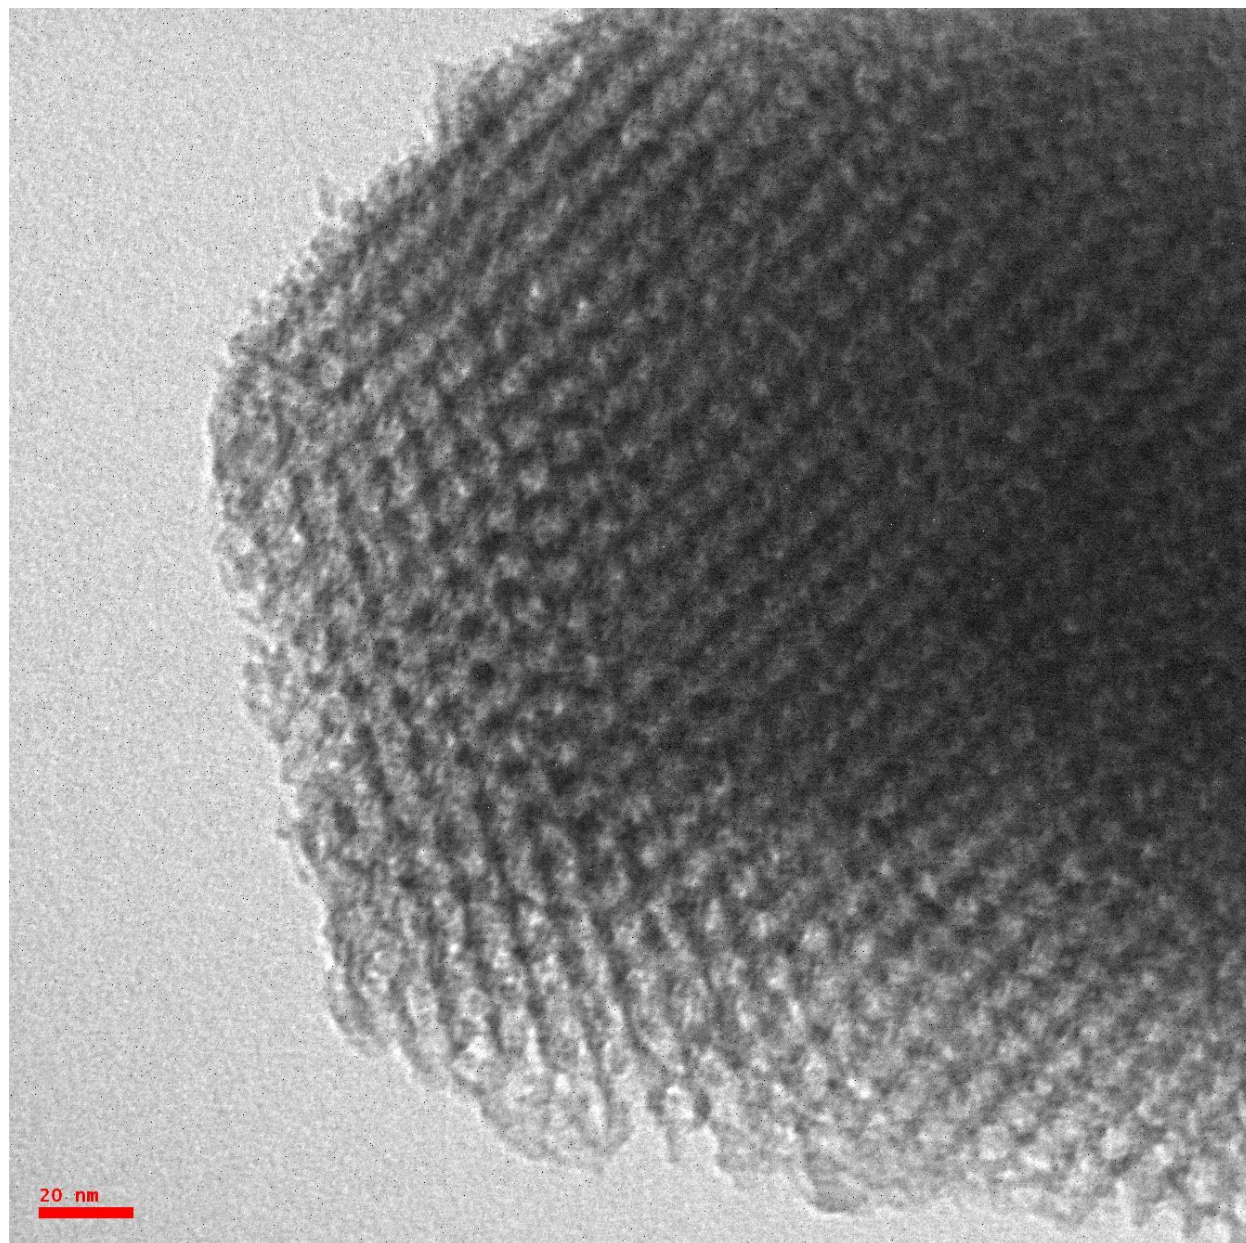

Fig.S 1 TEM image of 1PdNPs/SBA-15 sample

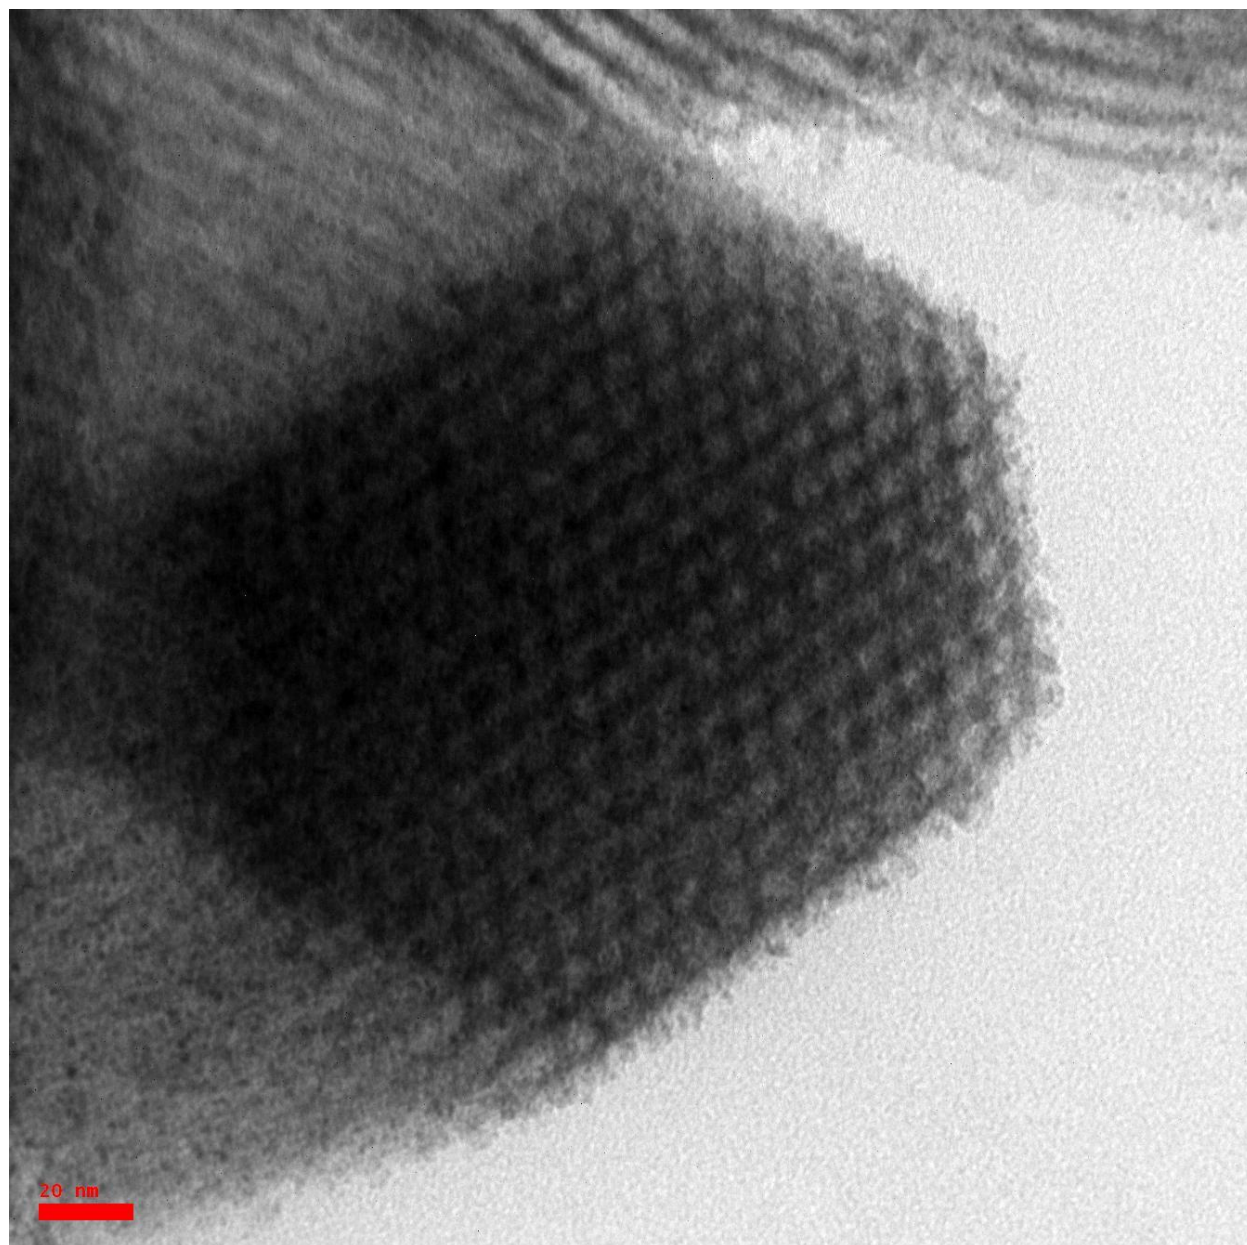

Fig.S 2 TEM image of 2.5PdNPs/SBA-15 sample

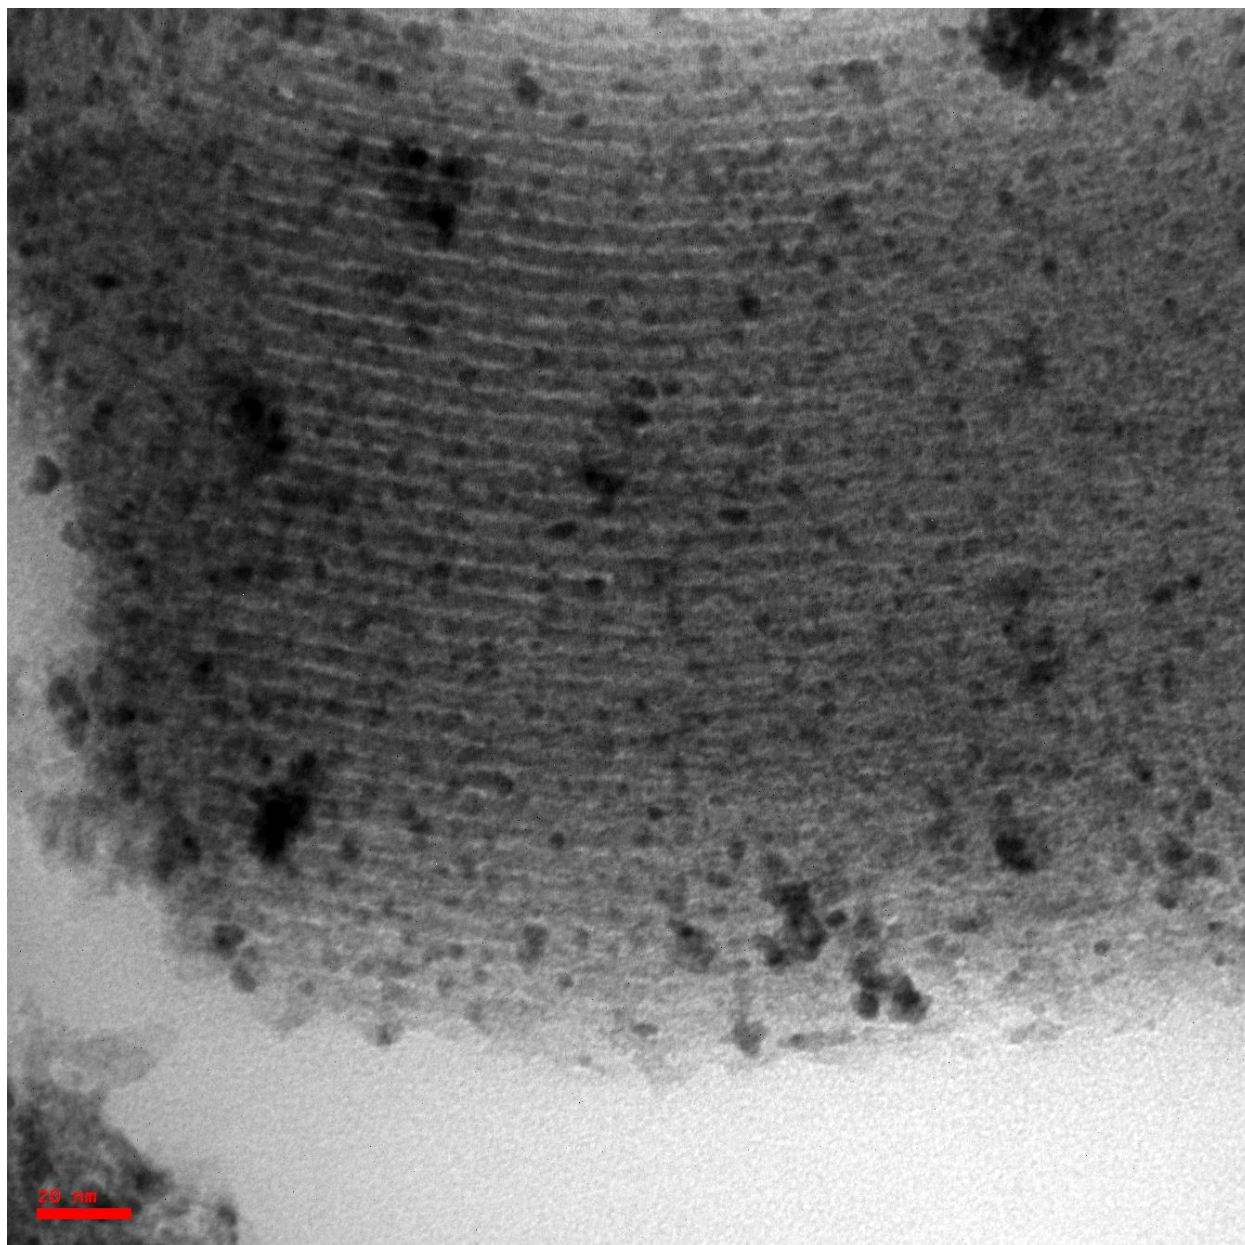

Fig.S 3 TEM image of 7.5PdNPs/SBA-15 sample
